# Supplementary material
Source: HighWire-hosted journal article supplement (https://cmajopen.ca/highwire/filestream/87761/field_highwire_adjunct_files/0/2021-0136-1-at.pdf)
Supplement: 2021-0136-1-at.pdf [file 2021-0136-1-at.pdf]

## Appendix A: Open ended questions

1. As a pregnant person, what are your thoughts and feelings about the recent pandemic of Coronavirus (COVID-19)?
2. How has this outbreak impacted your life and your plans if any?
3. What are your thoughts on whether this pandemic has impacted your pregnancy/baby?
4. What are your thoughts on whether this pandemic has impacted your physical and mental well-being?
5. How do you cope with this pandemic?
6. How can your healthcare provider(s) support you during this pandemic?

Appendix 1, as supplied by authors. Appendix to: Bayrampour H, Tamana SK, Boutin A. Pregnant people's responses to the COVID-19 pandemic: a mixed-methods, descriptive study. *CMAJ Open* 2022. DOI:10.9778/cmajo.20210136. Copyright © 2022 The Author(s) or their employer(s).

To receive this resource in an accessible format, please contact us at [cmajgroup@cmaj.ca](mailto:cmajgroup@cmaj.ca).
